# Supplementary material for: Rare Variants Association Analysis in Large-Scale Sequencing Studies at the Single Locus Level
Source: PLOS journal article supplement (doi:10.1371/journal.pcbi.1004993), 2016-06-29
Supplement: S4 (10.1371/journal.pcbi.1004993.s004) [file journal.pcbi.1004993.s004]

S3 Fig

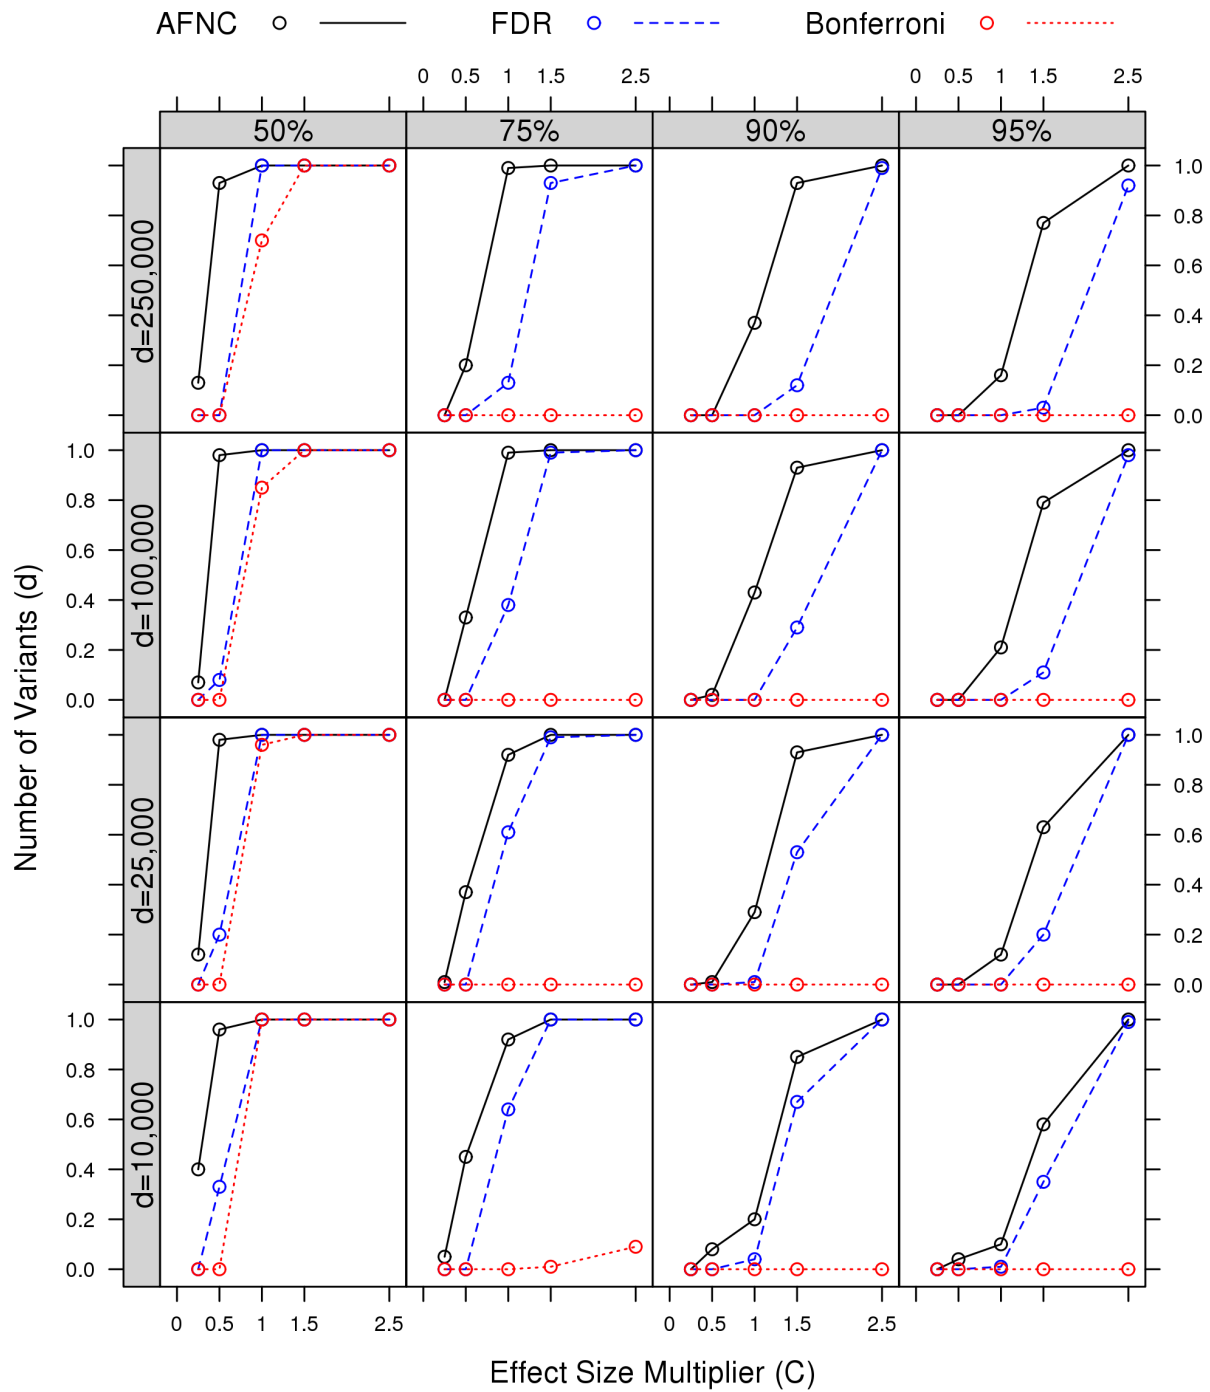

Figure S3: **Inclusion rate of causal variants across varying effect sizes and numbers of variants at  $s = 25$ .** Success rates of including at least 50%, 75%, 90%, and 95% of  $s$  variants are examined. Results are shown for  $s = 25$  number of causal variants when  $C \neq 0$  and  $n = 2000$  number of samples.
