# Supplementary material for: Rare Variants Association Analysis in Large-Scale Sequencing Studies at the Single Locus Level
Source: PLOS journal article supplement (doi:10.1371/journal.pcbi.1004993), 2016-06-29
Supplement: S6 (10.1371/journal.pcbi.1004993.s006) [file journal.pcbi.1004993.s006]

**S5 Fig**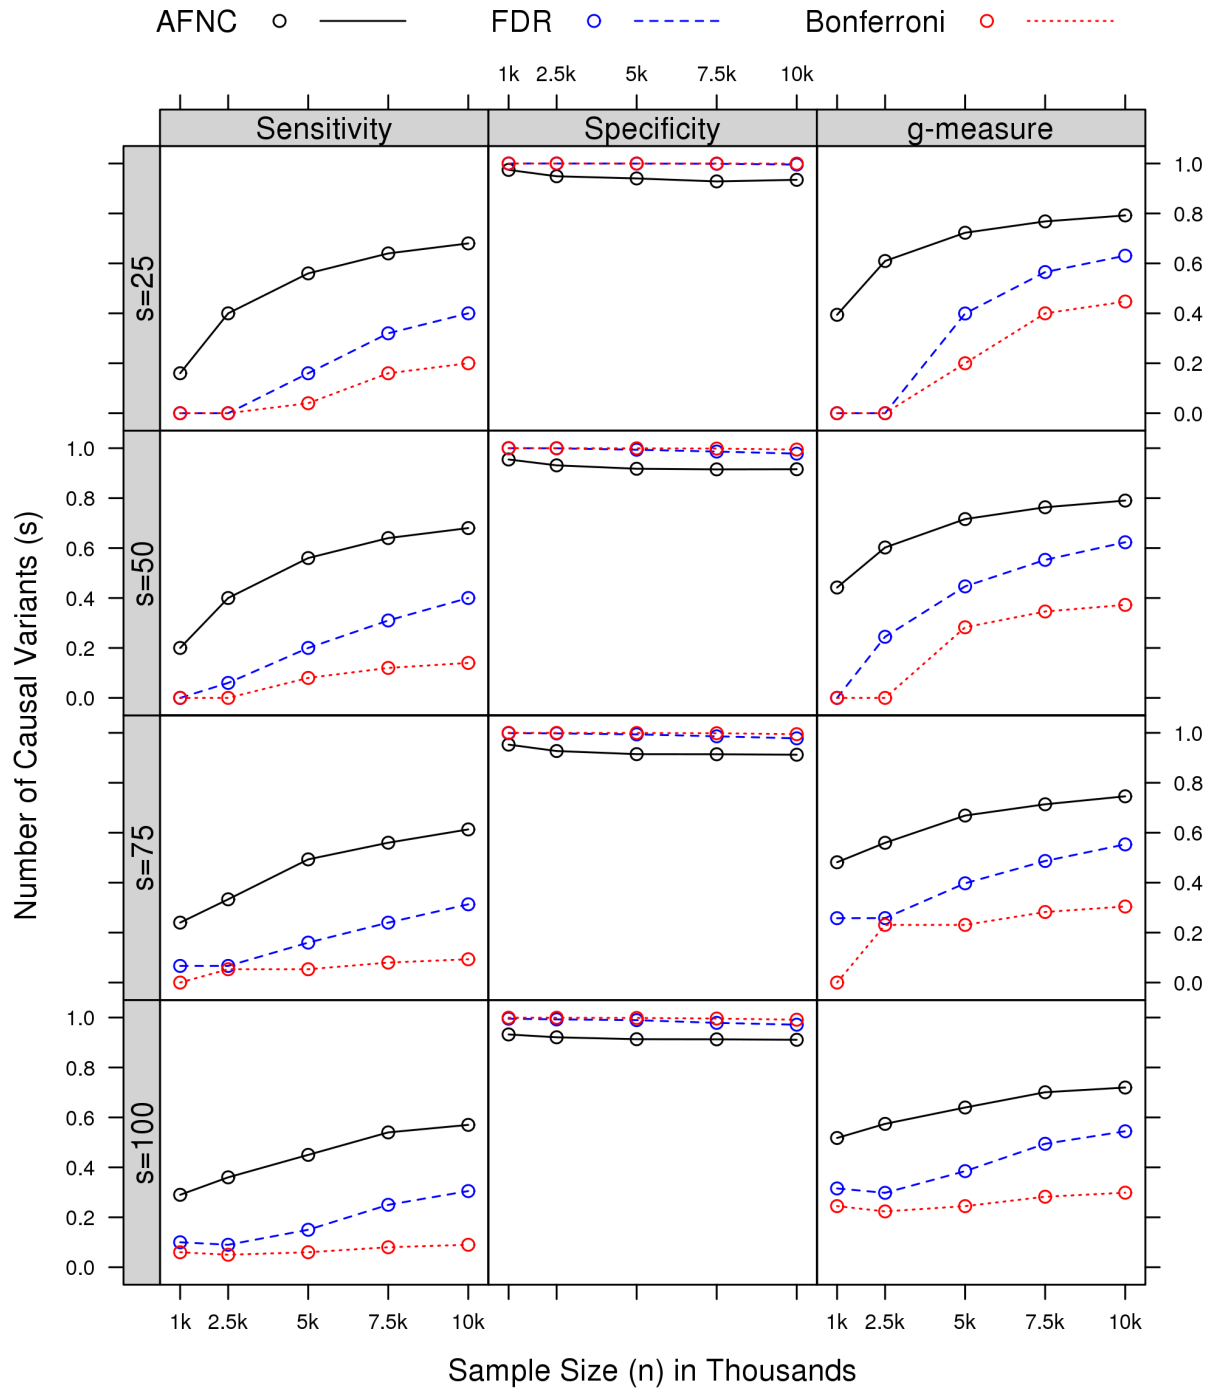

Figure S5: **Comparisons across varying sample sizes and numbers of causal variants at  $C = 0.25$ .** Performance of AFNC, FDR, and Bonferroni is evaluated in terms of sensitivity, specificity, and  $g$ -measure. Results are shown for the effect size multiplier  $C = 0.25$  and  $d = 100,000$  number of variants.
